# Supplementary material for: Motor symptoms in genetic frontotemporal dementia: developing a new module for clinical rating scales
Source: PubMed Central journal article supplement (PMC9971048; doi:10.1007/s00415-022-11442-y), 2022-11-17

**Motor symptoms in genetic frontotemporal dementia – developing a new module for clinical rating scales, *Journal of Neurology***

Kiran Samra<sup>1</sup>, Amy M. MacDougall<sup>2</sup>, Georgia Peakman<sup>1</sup>, Arabella Bouzigues<sup>1</sup>, Martina Bocchetta<sup>1</sup>, David M. Cash<sup>1</sup>, Caroline V. Greaves<sup>1</sup>, Rhian S. Convery<sup>1</sup>, John C. van Swieten<sup>3</sup>, Lize Jiskoot<sup>3</sup>, Harro Seelaar<sup>3</sup>, Fermin Moreno<sup>4,5</sup>, Raquel Sanchez-Valle<sup>6</sup>, Robert Laforce<sup>7</sup>, Caroline Graff<sup>8,9</sup>, Mario Masellis<sup>10</sup>, Carmela Tartaglia<sup>11</sup>, James B. Rowe<sup>12</sup>, Barbara Borroni<sup>13</sup>, Elizabeth Finger<sup>14</sup>, Matthis Synofzik<sup>15,16</sup>, Daniela Galimberti<sup>17,18</sup>, Rik Vandenberghe<sup>19,20,21</sup>, Alexandre de Mendonça<sup>22</sup>, Chris R. Butler<sup>23,24</sup>, Alexander Gerhard<sup>25,26</sup>, Simon Ducharme<sup>27,28</sup>, Isabelle Le Ber<sup>29,30,31,32</sup>, Pietro Tiraboschi<sup>33</sup>, Isabel Santana<sup>34,35</sup>, Florence Pasquier<sup>36,37,38</sup>, Johannes Levin<sup>39,40,41</sup>, Markus Otto<sup>42</sup>, Sandro Sorbi<sup>43,44</sup>, Jonathan D. Rohrer<sup>1\*</sup>, Lucy L. Russell<sup>1\*</sup>, on behalf of the Genetic FTD Initiative (GENFI)<sup>#</sup>

\*joint senior authors

<sup>#</sup>List of consortium authors in appendix

<sup>1</sup>Dementia Research Centre, Department of Neurodegenerative Disease, UCL Queen Square Institute of Neurology, London, UK.

<sup>2</sup>Department of Medical Statistics, London School of Hygiene and Tropical Medicine, London, UK

<sup>3</sup>Department of Neurology, Erasmus Medical Centre, Rotterdam, Netherlands

<sup>4</sup>Cognitive Disorders Unit, Department of Neurology, Donostia University Hospital, San Sebastian, Spain

<sup>5</sup>Neuroscience Area, Biodonostia Health Research Institute, San Sebastian, Gipuzkoa, Spain

<sup>6</sup>Alzheimer's disease and Other Cognitive Disorders Unit, Neurology Service, Hospital Clínic, Institut d'Investigacions Biomèdiques August Pi I Sunyer, University of Barcelona, Barcelona, Spain

<sup>7</sup>Clinique Interdisciplinaire de Mémoire, Département des Sciences Neurologiques, CHU de Québec, and Faculté de Médecine, Université Laval, QC, Canada

<sup>8</sup>Center for Alzheimer Research, Division of Neurogeriatrics, Department of Neurobiology, Care Sciences and Society, Bioclinicum, Karolinska Institutet, Solna, Sweden

<sup>9</sup>Unit for Hereditary Dementias, Theme Aging, Karolinska University Hospital, Solna, Sweden

<sup>10</sup>Sunnybrook Health Sciences Centre, Sunnybrook Research Institute, University of Toronto, Toronto, Canada

<sup>11</sup>Tanz Centre for Research in Neurodegenerative Diseases, University of Toronto, Toronto, ON, Canada

<sup>12</sup>Department of Clinical Neurosciences, University of Cambridge, UK

- <sup>13</sup>Neurology Unit, Department of Clinical and Experimental Sciences, University of Brescia, Brescia, Italy
- <sup>14</sup>Department of Clinical Neurological Sciences, University of Western Ontario, London, ON, Canada
- <sup>15</sup>Department of Neurodegenerative Diseases, Hertie-Institute for Clinical Brain Research and Center of Neurology, University of Tübingen, Tübingen, Germany
- <sup>16</sup>Center for Neurodegenerative Diseases (DZNE), Tübingen, Germany
- <sup>17</sup>Fondazione Ca' Granda, IRCCS Ospedale Policlinico, Milan, Italy
- <sup>18</sup>University of Milan, Centro Dino Ferrari, Milan, Italy
- <sup>19</sup>Laboratory for Cognitive Neurology, Department of Neurosciences, KU Leuven, Leuven, Belgium
- <sup>20</sup>Neurology Service, University Hospitals Leuven, Leuven, Belgium
- <sup>21</sup>Leuven Brain Institute, KU Leuven, Leuven, Belgium
- <sup>22</sup>Laboratory of Neurosciences, Institute of Molecular Medicine, Faculty of Medicine, University of Lisbon, Lisbon, Portugal
- <sup>23</sup>Nuffield Department of Clinical Neurosciences, Medical Sciences Division, University of Oxford, Oxford, UK
- <sup>24</sup>Department of Brain Sciences, Imperial College London, UK
- <sup>25</sup>Division of Neuroscience and Experimental Psychology, Wolfson Molecular Imaging Centre, University of Manchester, Manchester, UK
- <sup>26</sup>Departments of Geriatric Medicine and Nuclear Medicine, University of Duisburg-Essen, Germany
- <sup>27</sup>Department of Psychiatry, McGill University Health Centre, McGill University, Montreal, Québec, Canada
- <sup>28</sup>McConnell Brain Imaging Centre, Montreal Neurological Institute, McGill University, Montreal, Québec, Canada
- <sup>29</sup>Sorbonne Université, Paris Brain Institute – Institut du Cerveau – ICM, Inserm U1127, CNRS UMR 7225, AP-HP - Hôpital Pitié-Salpêtrière, Paris, France
- <sup>30</sup>Centre de référence des démences rares ou précoces, IM2A, Département de Neurologie, AP-HP - Hôpital Pitié-Salpêtrière, Paris, France
- <sup>31</sup>Département de Neurologie, AP-HP - Hôpital Pitié-Salpêtrière, Paris, France
- <sup>32</sup>Reference Network for Rare Neurological Diseases (ERN-RND)
- <sup>33</sup>Fondazione IRCCS Istituto Neurologico Carlo Besta, Milano, Italy
- <sup>34</sup>University Hospital of Coimbra (HUC), Neurology Service, Faculty of Medicine, University of Coimbra, Coimbra, Portugal
- <sup>35</sup>Center for Neuroscience and Cell Biology, Faculty of Medicine, University of Coimbra, Coimbra, Portugal
- <sup>36</sup>Univ Lille, France
- <sup>37</sup>Inserm 1172, Lille, France

<sup>38</sup>CHU, CNR-MAJ, Labex Distalz, LiCEND Lille, France

<sup>39</sup>Department of Neurology, Ludwig-Maximilians Universität München, Munich, Germany

<sup>40</sup>German Center for Neurodegenerative Diseases (DZNE), Munich, Germany

<sup>41</sup>Munich Cluster of Systems Neurology (SyNergy), Munich, Germany

<sup>42</sup>Department of Neurology, University of Ulm, Germany

<sup>43</sup>Department of Neurofarba, University of Florence, Italy

<sup>44</sup>IRCCS Fondazione Don Carlo Gnocchi, Florence, Italy

**Corresponding author:**

Dr Lucy L. Russell, Dementia Research Centre, Department of Neurodegenerative Disease, UCL Institute of Neurology, Queen Square, London, WC1N 3BG,  
l.russell@ucl.ac.uk

Online only (supplementary) material

Number of supplementary tables: 3

Number of supplementary figures: 3

**Supplementary eTable 1 Motor symptoms included in the GENFI Symptom Scales in the History assessment. Scoring of each symptom is on a scale similar to the CDR i.e. 0 (absent), 0.5 (very mild/questionable), 1 (mild), 2 (moderate), and 3 (severe).**

**Supplementary eTable 2 Scoring rules to derive the algorithm-based motor score (as per the method used to calculate the CDR<sup>®</sup> plus NACC FTLD Global Score)**

**Supplementary eTable 3 Mean (standard deviation) severity of motor symptoms in controls and mutation carriers. Bold items are significantly different to controls using linear regression analysis ( $p < 0.05$ ). Other differences are shown as <sup>a</sup>significantly impaired compared to *GRN* and <sup>b</sup>significantly impaired compared to *MAPT* using logistic regression analysis ( $p < 0.05$ ).**

**Supplementary eFigure 1 Frequency of each individual motor symptom score within all mutation carriers compared with the equivalent motor examination score. In the left-hand figure for each motor feature, frequency is on the y-axis, and the severity of the motor symptom or examination scores is shown on the x-axis with the following scale: 0 = absent, 0.5 = very mild, 1 = mild, 2 = moderate, 3 = severe. In the right-hand figure, a Sankey diagram illustrates the difference in numbers of cases with a particular severity score, with motor symptoms on the left of each diagram, and motor examination on the right.**

**Supplementary eFigure 2 Comparison of the Global Motor Score and the Algorithm-based Motor Score: 0 = absent, 0.5 = very mild, 1 = mild, 2 = moderate and 3 = severe.**

**Supplementary eFigure 3 Comparison of the CDR<sup>®</sup> plus NACC FTLD plus Global Motor Score (CDR<sup>®</sup> plus NACC FTLD-M) with the CDR<sup>®</sup> plus NACC FTLD plus Algorithm-based Motor Score (CDR<sup>®</sup> plus NACC FTLD-MI).**

**Supplementary eTable 1 Motor symptoms included in the GENFI Symptom Scales in the History assessment. Scoring of each symptom is on a scale similar to the CDR i.e. 0 (absent), 0.5 (very mild/questionable), 1 (mild), 2 (moderate), and 3 (severe).**

|                                                                                                                                                                           | <b>Questionable/Very mild</b>                                                               | <b>Mild</b>                                                                                                                                     | <b>Moderate</b>                                                                                             | <b>Severe</b>                                                                                              |
|---------------------------------------------------------------------------------------------------------------------------------------------------------------------------|---------------------------------------------------------------------------------------------|-------------------------------------------------------------------------------------------------------------------------------------------------|-------------------------------------------------------------------------------------------------------------|------------------------------------------------------------------------------------------------------------|
| <b>Global Motor Score</b>                                                                                                                                                 | Questionable/very mild motor impairment.                                                    | Mild motor impairment.                                                                                                                          | Moderate motor impairment.                                                                                  | Severe motor impairment.                                                                                   |
| <b>Dysarthria</b><br>Has the subject had difficulties with articulation?                                                                                                  | Possible speech disturbance of questionable significance or very mild.                      | Detectable speech disturbance – may be asked to repeat statements infrequently.                                                                 | Becoming less intelligible – frequently asked to repeat statements.                                         | Generally unintelligible.                                                                                  |
| <b>Dysphagia</b><br>Has the subject had difficulties with swallowing?                                                                                                     | Rare choking of questionable significance.                                                  | Swallowing problems are evident with regular episodes of choking.                                                                               | Requires changes in dietary consistency.                                                                    | Needs supplemental tube feeding.                                                                           |
| <b>Tremor</b><br>Has the subject had rhythmic shaking, especially in the hands, arms, legs or head?                                                                       | Tremor is infrequently present and of questionable significance or very mild.               | Tremor is evident but is generally not distressing to the patient.                                                                              | Tremor is evident, may be distressing and interferes with many activities.                                  | Tremor interferes with most activities.                                                                    |
| <b>Slowness</b><br>Has the subject noticeably slowed down in walking or moving or handwriting, other than injury or illness? Has the subject's facial expression changed? | Slight slowing down of movements of questionable significance or very mild.                 | Mild slowing – slower walking but requires little or no assistance; writing slower but still legible; definite diminution of facial expression. | Moderate slowing – walks with assistance; not all words legible when writing; lips parted some of the time. | Severe slowing – cannot walk; majority of words not legible; severe or complete loss of facial expression. |
| <b>Weakness</b><br>Has the subject noticed their arms or legs have become weak?                                                                                           | Possible weakness of limbs but of questionable significance or very mild.                   | Mild weakness – does not require assistance with using arms or walking.                                                                         | Moderate weakness – requires assistance walking or with activities requiring the arms.                      | Severe weakness – unable to walk and/or use arms.                                                          |
| <b>Gait disorder</b><br>Has the subject's walking changed, not specifically due to arthritis or injury? Is the subject unsteady, or shuffle when walking, or drag a foot? | Possibly some difficulties with walking but of questionable significance or very mild.      | Requires little or no assistance.                                                                                                               | Walks with assistance.                                                                                      | Cannot walk at all, even with assistance.                                                                  |
| <b>Falls</b><br>Does the subject fall more than usual?                                                                                                                    | Rare falls of questionable significance.                                                    | Occasional falls but less than once per day.                                                                                                    | Falls on average once daily.                                                                                | Falls more than once daily.                                                                                |
| <b>Functional difficulties using hands</b><br>E.g. using knife and fork, buttoning clothes, washing hands and face                                                        | Possible functional difficulties using hands but of questionable significance or very mild. | Requires little or no assistance.                                                                                                               | Requires assistance.                                                                                        | Cannot use hands at all even with assistance.                                                              |

**Supplementary eTable 2 Scoring rules to derive the algorithm-based motor score (as per the method used to calculate the CDR<sup>®</sup> plus NACC FTLD Global Score)**

| <b>Individual scores</b>                | <b>Overall score</b> |
|-----------------------------------------|----------------------|
| All 0                                   | 0                    |
| Maximum 0.5                             | 0.5                  |
| Maximum > 0.5:                          |                      |
| Maximum 1, all others 0                 | 0.5                  |
| Maximum 2 or 3, all others 0            | 1                    |
| Maximum occurs once, another rating > 0 | One level < maximum  |
| Maximum occurs > once                   | Maximum score        |

Supplementary eTable 3 Mean (standard deviation) severity of motor symptoms in controls and mutation carriers. Bold items are significantly different to controls using linear regression analysis ( $p < 0.05$ ). Other differences are shown as <sup>a</sup>significantly impaired compared to *GRN* and <sup>b</sup>significantly impaired compared to *MAPT* using logistic regression analysis ( $p < 0.05$ ).

| CDR® plus NACC FTLD                 | Controls    | All mutation carriers |                    |                    | <i>C9orf72</i> |                                |                                 | <i>GRN</i>  |             |                    | <i>MAPT</i> |             |                    |
|-------------------------------------|-------------|-----------------------|--------------------|--------------------|----------------|--------------------------------|---------------------------------|-------------|-------------|--------------------|-------------|-------------|--------------------|
|                                     |             | 0                     | 0.5                | 1+                 | 0              | 0.5                            | 1+                              | 0           | 0.5         | 1+                 | 0           | 0.5         | 1+                 |
| Dysarthria                          | 0.01 (0.06) | 0.01 (0.12)           | 0.08 (0.37)        | <b>0.37 (0.79)</b> | 0.02 (0.19)    | 0.16 (0.54)                    | <b>0.40 (0.78)<sup>b</sup></b>  | 0.00 (0.00) | 0.02 (0.09) | <b>0.45 (0.95)</b> | 0.00 (0.00) | 0.00 (0.00) | 0.08 (0.28)        |
| Dysphagia                           | 0.01 (0.07) | 0.00 (0.03)           | 0.08 (0.37)        | <b>0.27 (0.58)</b> | 0.00 (0.05)    | 0.16 (0.54)                    | <b>0.39 (0.66)<sup>ab</sup></b> | 0.00 (0.00) | 0.02 (0.09) | 0.19 (0.55)        | 0.00 (0.00) | 0.00 (0.00) | 0.06 (0.22)        |
| Tremor                              | 0.03 (0.14) | 0.02 (0.13)           | 0.04 (0.17)        | <b>0.31 (0.62)</b> | 0.03 (0.15)    | 0.01 (0.08)                    | <b>0.40 (0.71)<sup>b</sup></b>  | 0.02 (0.14) | 0.05 (0.20) | <b>0.29 (0.59)</b> | 0.01 (0.07) | 0.07 (0.27) | 0.08 (0.28)        |
| Slowness                            | 0.01 (0.09) | 0.01 (0.14)           | 0.04 (0.18)        | <b>0.65 (0.83)</b> | 0.03 (0.21)    | 0.07 (0.21)                    | <b>0.77 (0.86)</b>              | 0.00 (0.00) | 0.03 (0.18) | <b>0.60 (0.88)</b> | 0.02 (0.14) | 0.00 (0.00) | <b>0.40 (0.52)</b> |
| Weakness                            | 0.01 (0.10) | 0.03 (0.22)           | <b>0.15 (0.51)</b> | <b>0.27 (0.62)</b> | 0.06 (0.30)    | <b>0.26 (0.71)<sup>a</sup></b> | <b>0.39 (0.69)<sup>a</sup></b>  | 0.00 (0.04) | 0.05 (0.20) | <b>0.22 (0.63)</b> | 0.04 (0.29) | 0.07 (0.27) | 0.00 (0.00)        |
| Gait disorder                       | 0.01 (0.07) | 0.02 (0.20)           | <b>0.11 (0.44)</b> | <b>0.55 (0.84)</b> | 0.04 (0.27)    | 0.19 (0.60)                    | <b>0.71 (0.91)<sup>a</sup></b>  | 0.02 (0.18) | 0.06 (0.25) | <b>0.47 (0.84)</b> | 0.00 (0.00) | 0.00 (0.00) | 0.24 (0.48)        |
| Falls                               | 0.01 (0.07) | 0.01 (0.14)           | 0.06 (0.35)        | <b>0.32 (0.63)</b> | 0.03 (0.21)    | 0.14 (0.52)                    | <b>0.45 (0.70)<sup>a</sup></b>  | 0.00 (0.00) | 0.00 (0.00) | <b>0.23 (0.60)</b> | 0.02 (0.14) | 0.00 (0.00) | 0.14 (0.34)        |
| Functional difficulties using hands | 0.00 (0.06) | 0.02 (0.18)           | <b>0.12 (0.50)</b> | <b>0.40 (0.74)</b> | 0.03 (0.22)    | <b>0.26 (0.72)<sup>a</sup></b> | <b>0.55 (0.83)</b>              | 0.01 (0.06) | 0.02 (0.09) | <b>0.31 (0.67)</b> | 0.04 (0.29) | 0.00 (0.00) | 0.16 (0.45)        |

**Supplementary eFigure 1** Frequency of each individual motor symptom score within all mutation carriers compared with the equivalent motor examination score. In the left-hand figure for each motor feature, frequency is on the y-axis, and the severity of the motor symptom or examination scores is shown on the x-axis with the following scale: 0 = absent, 0.5 = very mild, 1 = mild, 2 = moderate, 3 = severe. In the right-hand figure, a Sankey diagram illustrates the difference in numbers of cases with a particular severity score, with motor symptoms on the left of each diagram, and motor examination on the right.

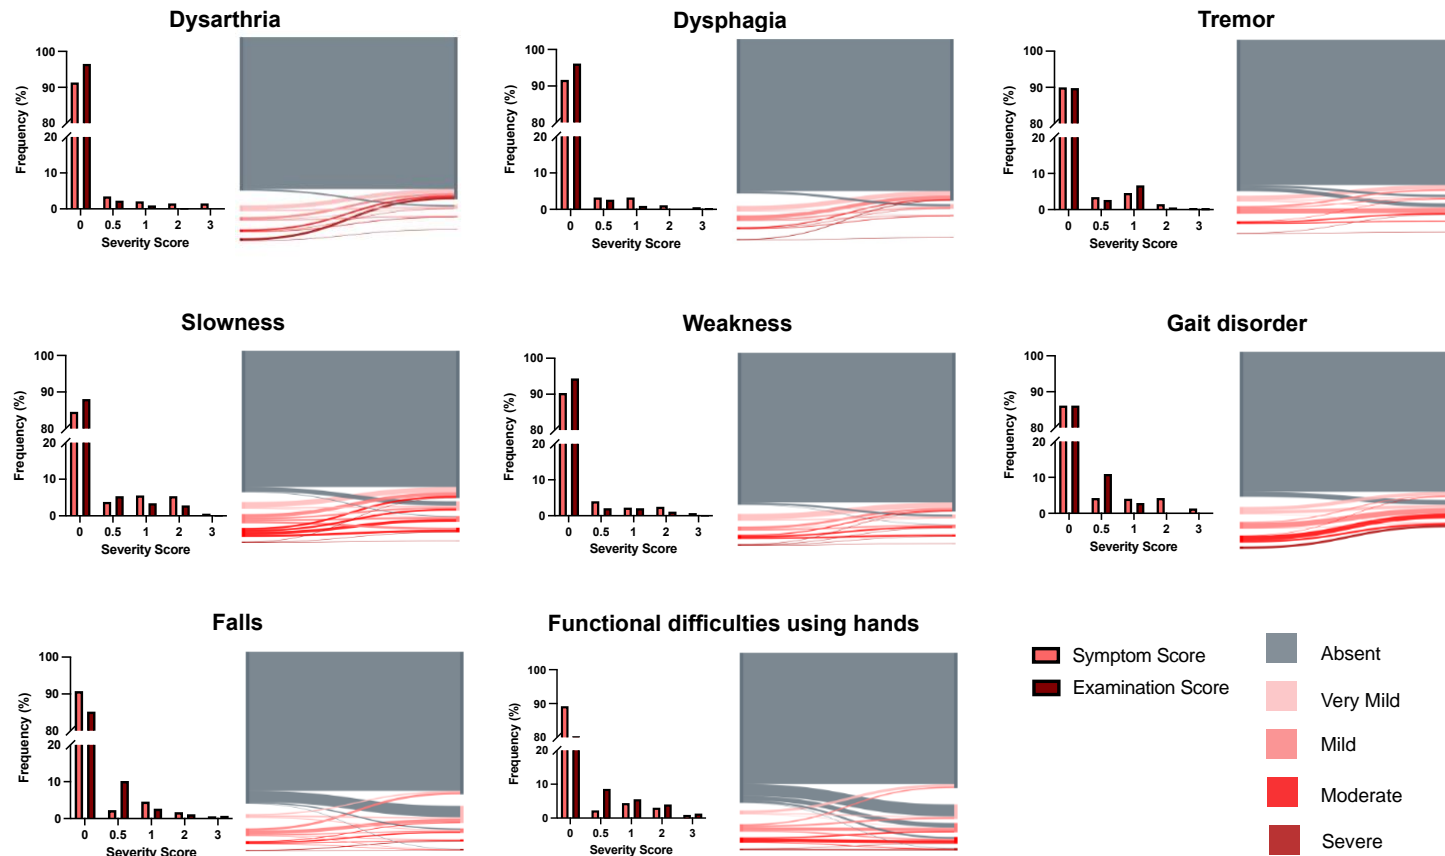



**Supplementary eFigure 2 Comparison of the Global Motor Score and the Algorithm-based Motor Score: 0 = absent, 0.5 = very mild, 1 = mild, 2 = moderate and 3 = severe.**

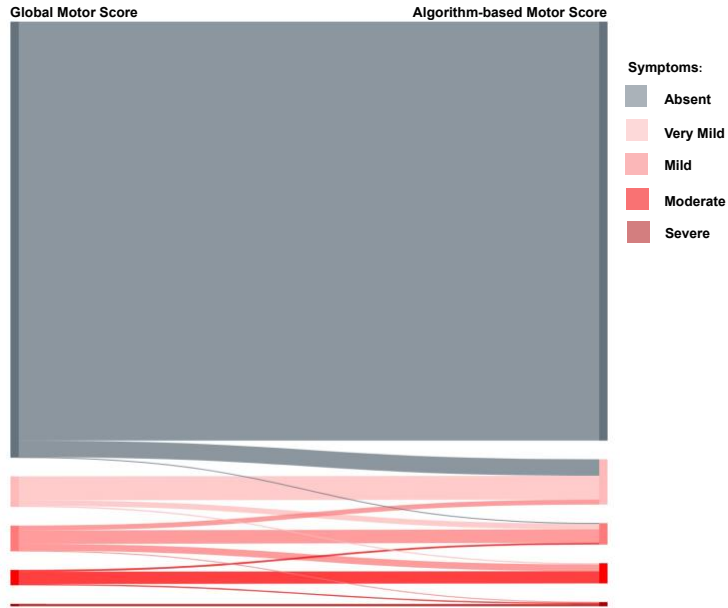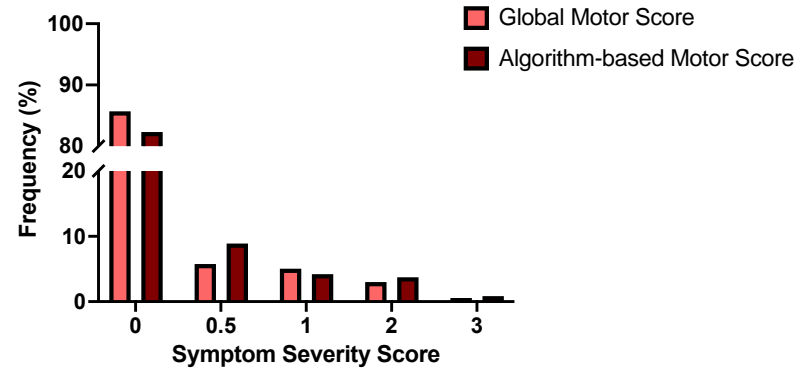

**Supplementary eFigure 3 Comparison of the CDR® plus NACC FTLD plus Global Motor Score (CDR® plus NACC FTLD-M) with the CDR® plus NACC FTLD plus Algorithm-based Motor Score (CDR® plus NACC FTLD-MI).**

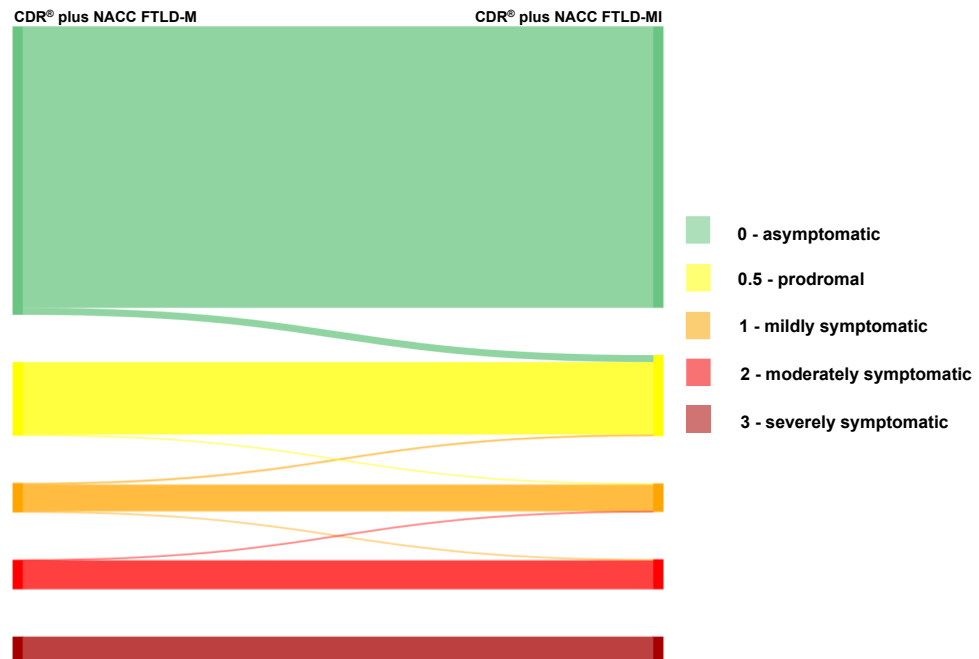

Supplement: 415_2022_11442_MOESM1_ESM.pdf [file 415_2022_11442_MOESM1_ESM.pdf]
